CORRECTION

# Correction: Effect of Carotene and Lycopene on the Risk of Prostate Cancer: A Systematic Review and Dose-Response Meta-Analysis of Observational Studies

Yulan Wang, Ran Cui, Yuanyuan Xiao, Juemin Fang, Qing Xu

[Fig 2](#) is incorrect. The image that appears as [Fig 2](#) is a duplicate of Table 1. Please view the correct [Fig 2](#) below.

[Fig 3](#) is incorrect. The image that appears as [Fig 3](#) is a duplicate of the correct [Fig 2](#). Please view the correct [Fig 3](#) below.

[Fig 4](#) is incorrect. The image that appears as [Fig 4](#) is a duplicate of Table 2. Please view the correct [Fig 4](#) below.

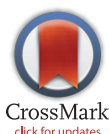

## OPEN ACCESS

**Citation:** Wang Y, Cui R, Xiao Y, Fang J, Xu Q (2015) Correction: Effect of Carotene and Lycopene on the Risk of Prostate Cancer: A Systematic Review and Dose-Response Meta-Analysis of Observational Studies. PLoS ONE 10(10): e0140415. doi:10.1371/journal.pone.0140415

**Published:** October 8, 2015

**Copyright:** © 2015 Wang et al. This is an open access article distributed under the terms of the [Creative Commons Attribution License](#), which permits unrestricted use, distribution, and reproduction in any medium, provided the original author and source are credited.

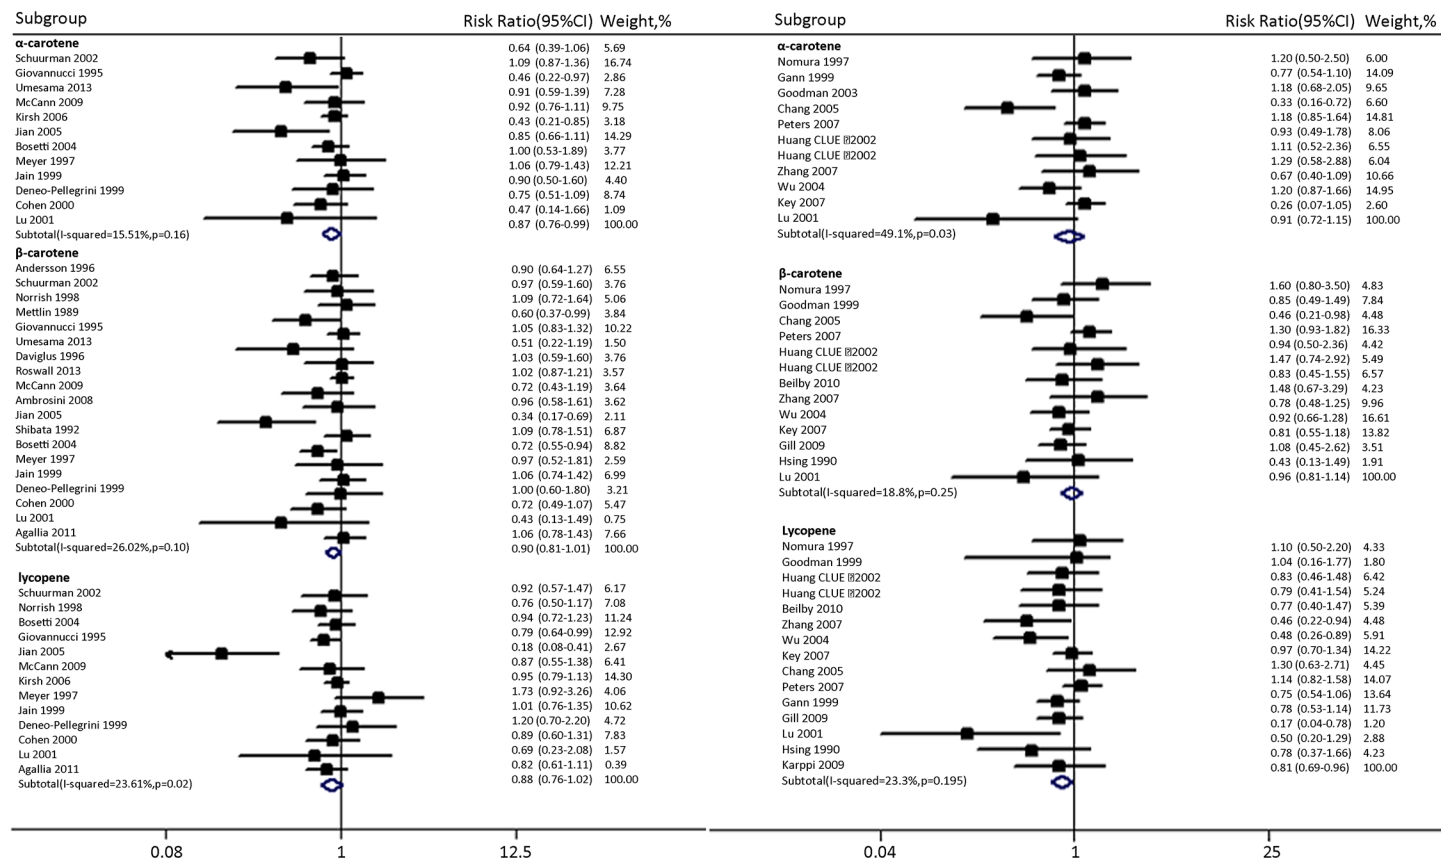

**Fig 2. Pooled risks according to dietary carotenoids intake and its blood levels.** Dietary intake of  $\alpha$ -carotene,  $\beta$ -carotene, lycopene and PCa risk(left), blood levels of  $\alpha$ -carotene,  $\beta$ -carotene, lycopene and PCa risk(right).

doi:10.1371/journal.pone.0140415.g001

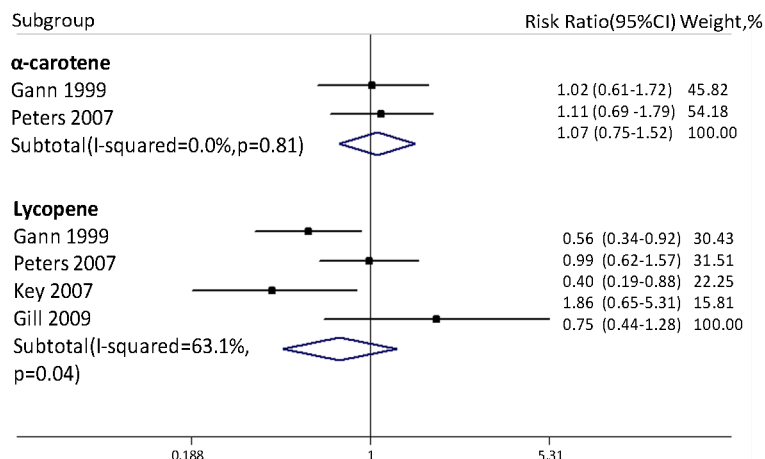

**Fig 3. Association between blood  $\alpha$ -carotene and lycopene levels and risk of advanced PCa.** Advanced PCa was defined as stage III or IV or Gleason score  $\geq 7$ .

doi:10.1371/journal.pone.0140415.g002

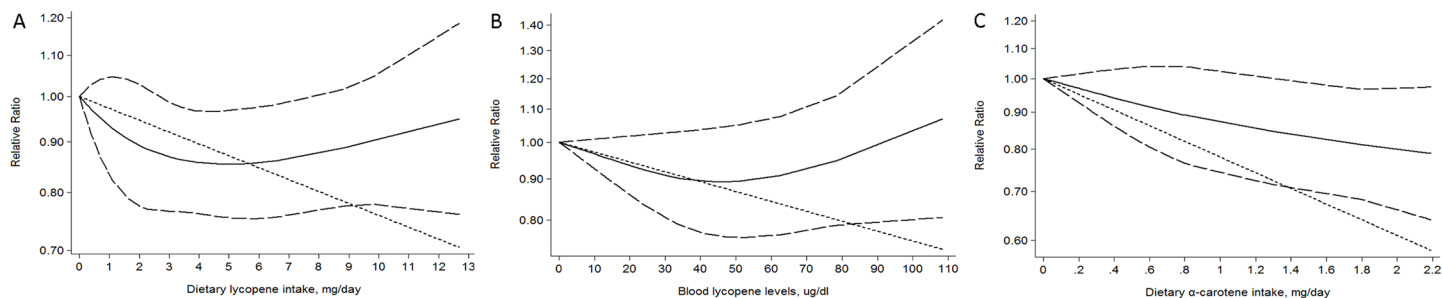

**Fig 4. Dose-response relation plots between carotenoids consumption and risk of PCa.** (A) Dietary lycopene intake(mg/day) and risk of PCa; (B) Blood lycopene levels (ug/dl) and risk of PCa; (C) Dietary  $\alpha$ -carotene intake(mg/day) and risk of PCa. These relationships were estimated by using random-effects metaregression. Dotted lines represent the 95% CIs for the fitted trend.

doi:10.1371/journal.pone.0140415.g003

## Reference

1. Wang Y, Cui R, Xiao Y, Fang J, Xu Q (2015) Effect of Carotene and Lycopene on the Risk of Prostate Cancer: A Systematic Review and Dose-Response Meta-Analysis of Observational Studies. PLoS ONE 10(9): e0137427. doi:[10.1371/journal.pone.0137427](https://doi.org/10.1371/journal.pone.0137427) PMID: [26372549](https://pubmed.ncbi.nlm.nih.gov/26372549/)
